# Supplementary material for: Incorporation of a Hydrophilic Spacer Reduces Hepatic Uptake of HER2-Targeting Affibody–DM1 Drug Conjugates
Source: PubMed Central journal article supplement (PMC6721809; doi:10.3390/cancers11081168), 2019-08-14

Supplementary Material

# Incorporation of a Hydrophilic Spacer Reduces Hepatic Uptake of HER2-Targeting Affibody-DM1 Drug Conjugates

Haozhong Ding, Mohamed Altai, Sara S. Rinne, Anzhelika Vorobyeva, Vladimir Tolmachev, Torbjörn Gräslund and Anna Orlova

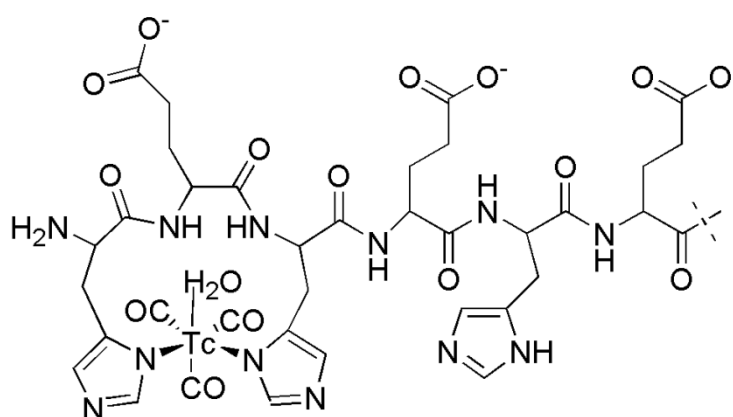

Figure S1. Scheme 1: Structures of the  $^{99m}\text{Tc}(\text{CO})_3$  chelated by HEHEHE tag.

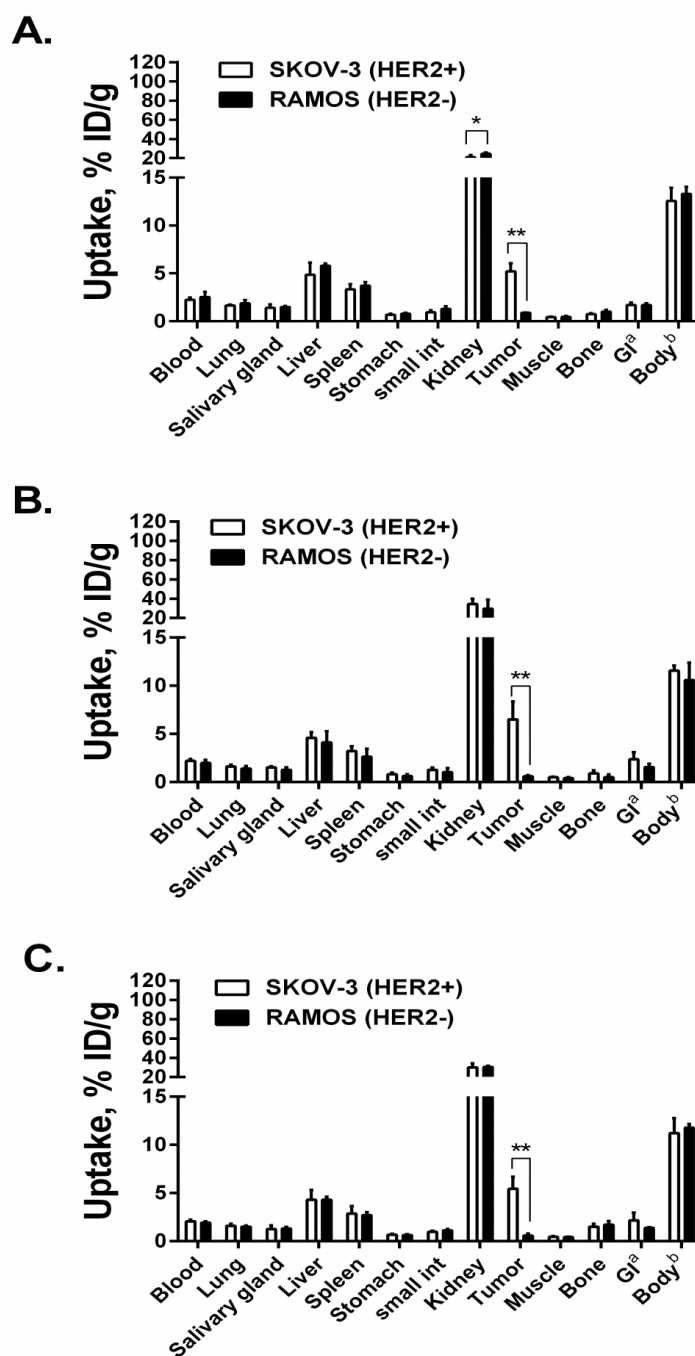

**Figure S2.** In vivo specificity. Comparative biodistribution of  $^{99m}\text{Tc}$ -labeled  $(Z_{\text{HER2:2891}})_2\text{-ABD-MC-DM1}$  (A),  $(Z_{\text{HER2:2891}})_2\text{-ABD-E}_3\text{-MC-DM1}$  (B) and  $(Z_{\text{HER2:2891}})_2\text{-ABD-E}_6\text{-MC-DM1}$  (C) expressed as %ID/g and presented as an average value from 4 animals  $\pm$  1 SD at 46 h after injection in mice bearing HER2+ SKOV-3 (empty) or HER2- RAMOS (filled) tumor xenografts. a,b Data are presented as %ID per whole sample. Data were assessed using student t-test test in order to determine significant differences ( $p < 0.05$ ).

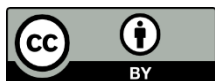

Supplement: cancers-11-01168-s001.pdf [file cancers-11-01168-s001.pdf]
